# Supplementary material for: The Therapeutic Potential of Zuogui Wan in Oligoasthenozoospermia: Insights from Network Pharmacology, Molecular Docking, Molecular Dynamics Simulation, and Experimental Validation
Source: Research Square preprint supplement (doi:10.21203/rs.3.rs-6723488/v1), 2025-06-16
Supplement: Supplementary file 1 [file 5cbddc77ceda8a94faf2c7a2.docx]

Supplementary Material

## Supplementary Figures


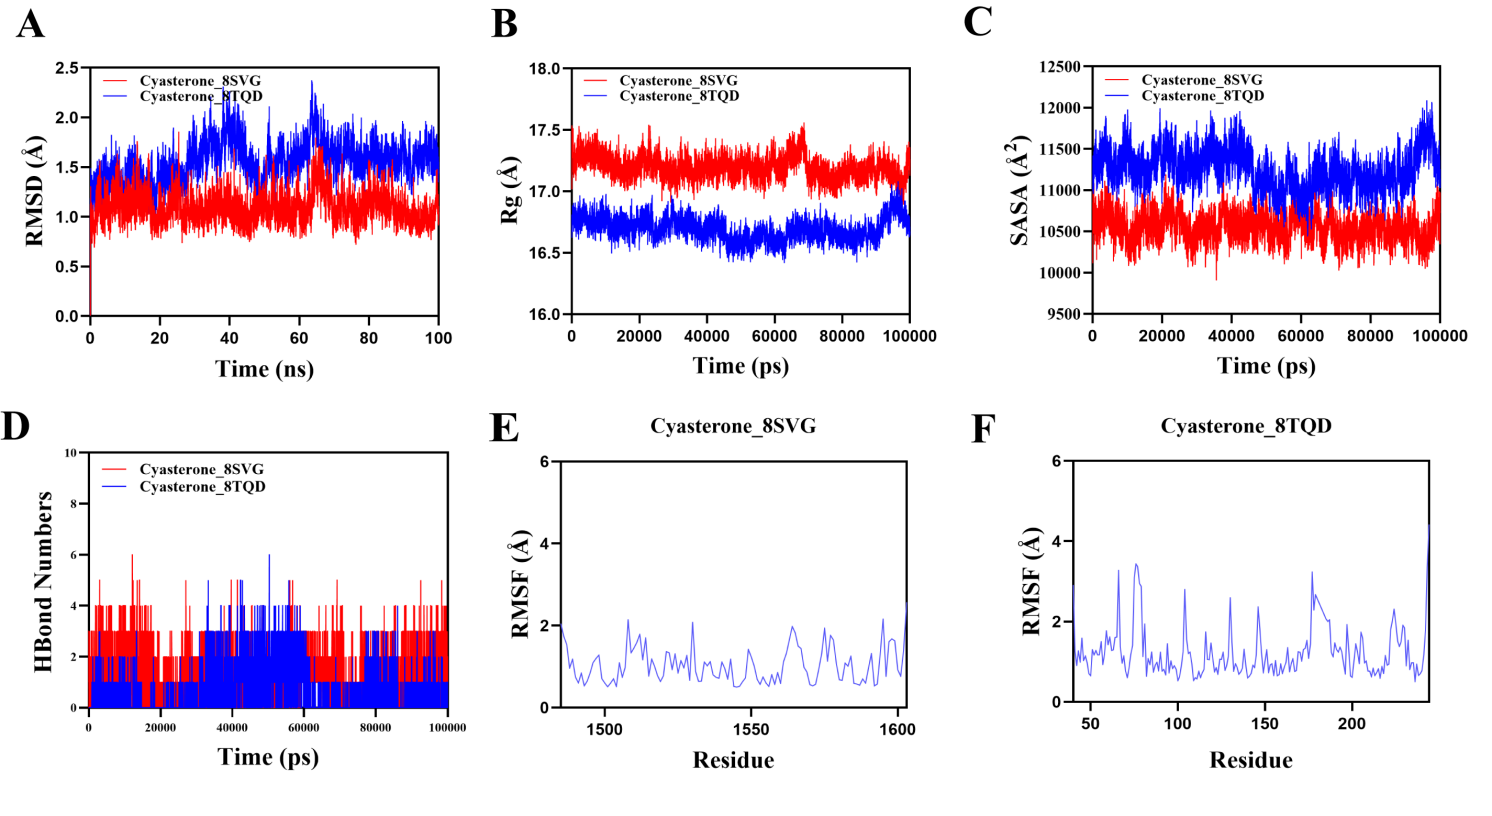


**Supplementary Figure 1.** Molecular dynamics simulation of key compounds and core target proteins.(A) Root Mean Square Deviation (RMSD) analysis of Cyasterone_8SVG and Cyasterone_8TQD.(B) Radius of Gyration (Rg) analysis of Cyasterone_8SVG and Cyasterone_8TQD.(C) Solvent Accessible Surface Area (SASA) analysis of Cyasterone_8SVG and Cyasterone_8TQD.(D) Hydrogen Bond Numbers (HBond Numbers) analysis of Cyasterone_8SVG and Cyasterone_8TQD.(E) Root Mean Square Fluctuation (RMSF) analysis of Cyasterone_8SVG.(F) Root Mean Square Fluctuation (RMSF) analysis of Cyasterone_8TQD.
